# Supplementary material for: Co2+ substituted for Bi3+ in BiVO4 and its enhanced photocatalytic activity under visible LED light irradiation
Source: Royal Society of Chemistry journal article supplement (doi:10.1039/c9ra04188e), 2019-01-01
Supplement: c9ra04188e1.pdf [file c9ra04188e1.pdf]

**Electronic Supplementary Information (ESI)**  
**for**  
**Co<sup>2+</sup> substituted for Bi<sup>3+</sup> in BiVO<sub>4</sub> and its enhanced photocatalytic**  
**activity under visible LED light irradiation**

Trinh Duy Nguyen,<sup>\*a</sup> Quynh Thi Phuong Bui,<sup>b</sup> Tien Bao Le,<sup>b</sup> T. M. Altahtamouni,<sup>c</sup> Khanh

Bao Vu,<sup>d</sup> Dai-Viet N. Vo,<sup>a</sup> Nhan Thi Hong Le,<sup>e</sup> Tuan Duy Luu,<sup>e</sup> Seong Soo Hong,<sup>f</sup> and

Kwon Taek Lim<sup>g</sup>

<sup>a</sup> *Center of Excellence for Green Energy and Environmental Nanomaterials (CE@GrEEN),*

*Nguyen Tat Thanh University, Ho Chi Minh City, Vietnam.*

<sup>b</sup> *Faculty of Chemical Technology, Ho Chi Minh City University of Food Industry, 140 Le Trong*

*Tan, Tan Phu District, Ho Chi Minh City, Vietnam*

<sup>c</sup> *Materials Science and Technology Program, College of Arts and Sciences, Qatar University*

*Doha 2713, Qatar*

<sup>d</sup> *NTT Hi-Tech Institute, Nguyen Tat Thanh University, Ho Chi Minh City, Vietnam*

<sup>e</sup> *Department of Chemical Engineering, HCMC University of Technology, VNU-HCM, Ho Chi*

*Minh City, Vietnam*

<sup>f</sup> *Department of Chemical Engineering, Pukyong National University, Busan, Korea*

<sup>g</sup> *Department of Display Engineering, Pukyong National University, Busan, Korea*

\*Corresponding authors: T.D. Nguyen, Fax: (+84)-028-39-404-759; Tel: (+84)-028-3941-1211;

E-mail: ndtrinh@ntt.edu.vn

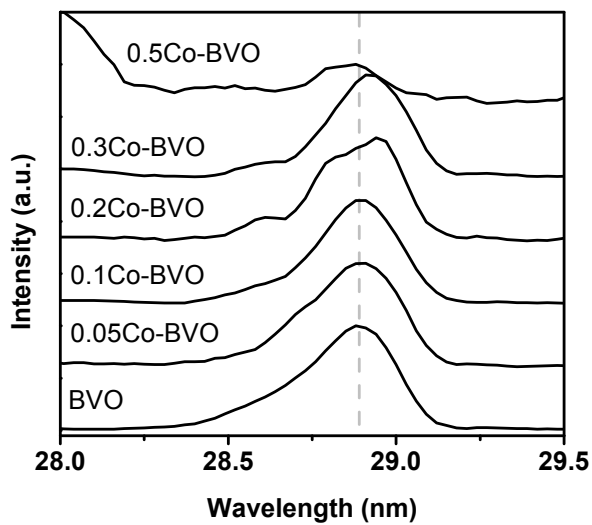

Fig. S1. XRD patterns of the pristine BiVO<sub>4</sub> and Co-doped BiVO<sub>4</sub> samples.

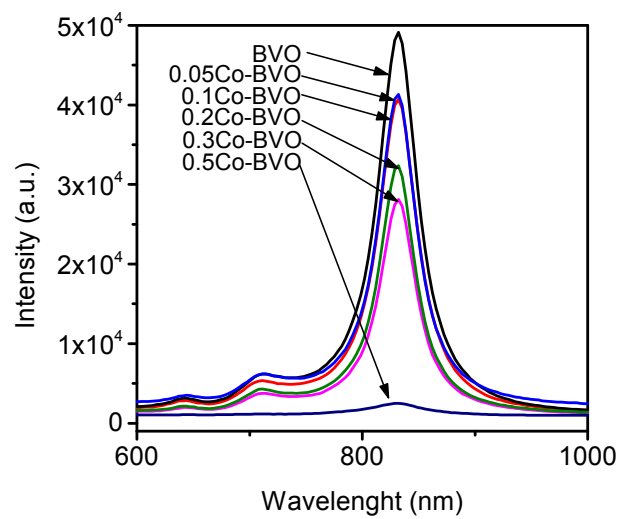

Fig. S2. Raman spectra of the pristine BiVO<sub>4</sub> and Co-doped BiVO<sub>4</sub> samples.

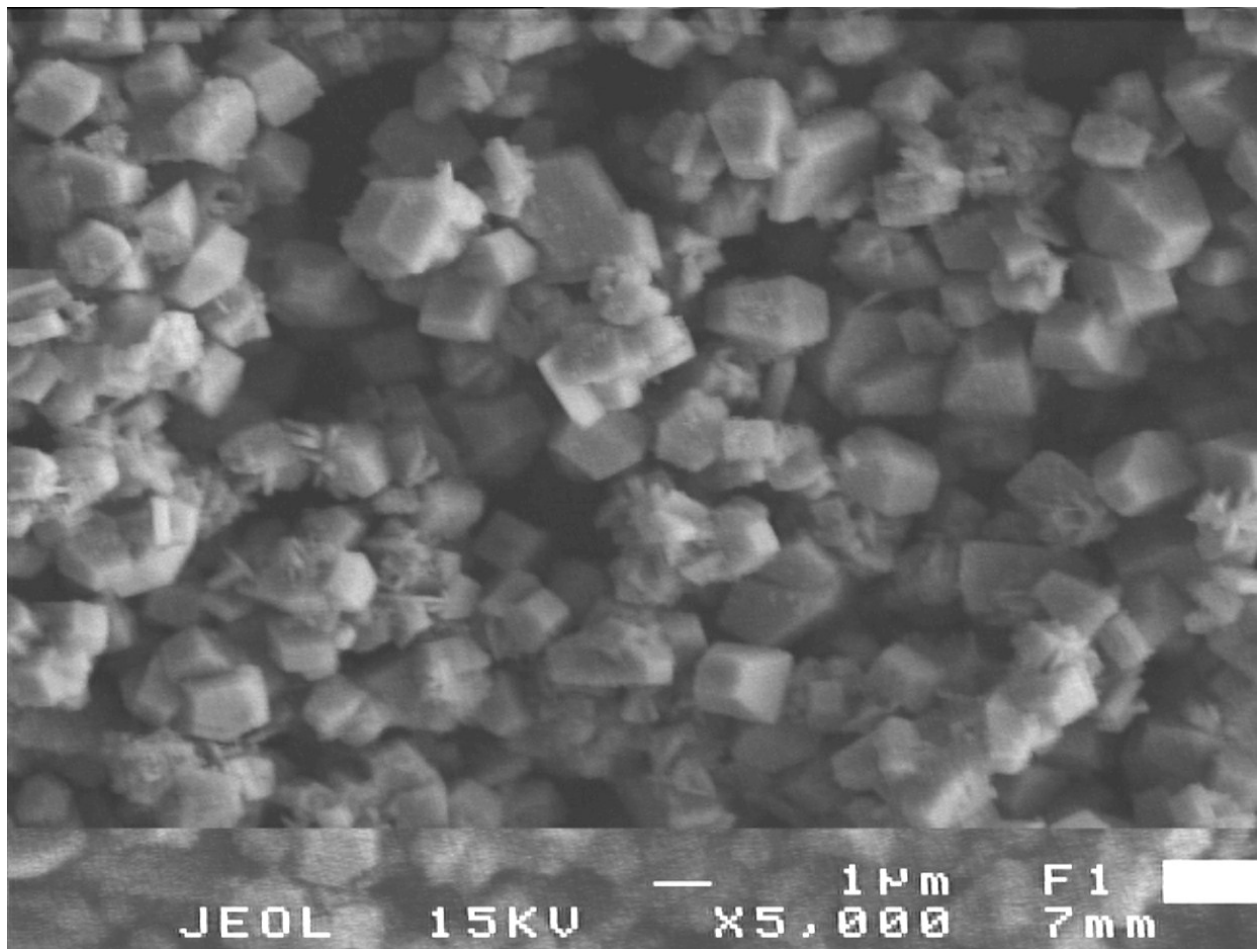

Fig. S3(A). SEM images of the 0.05Co-BVO sample.

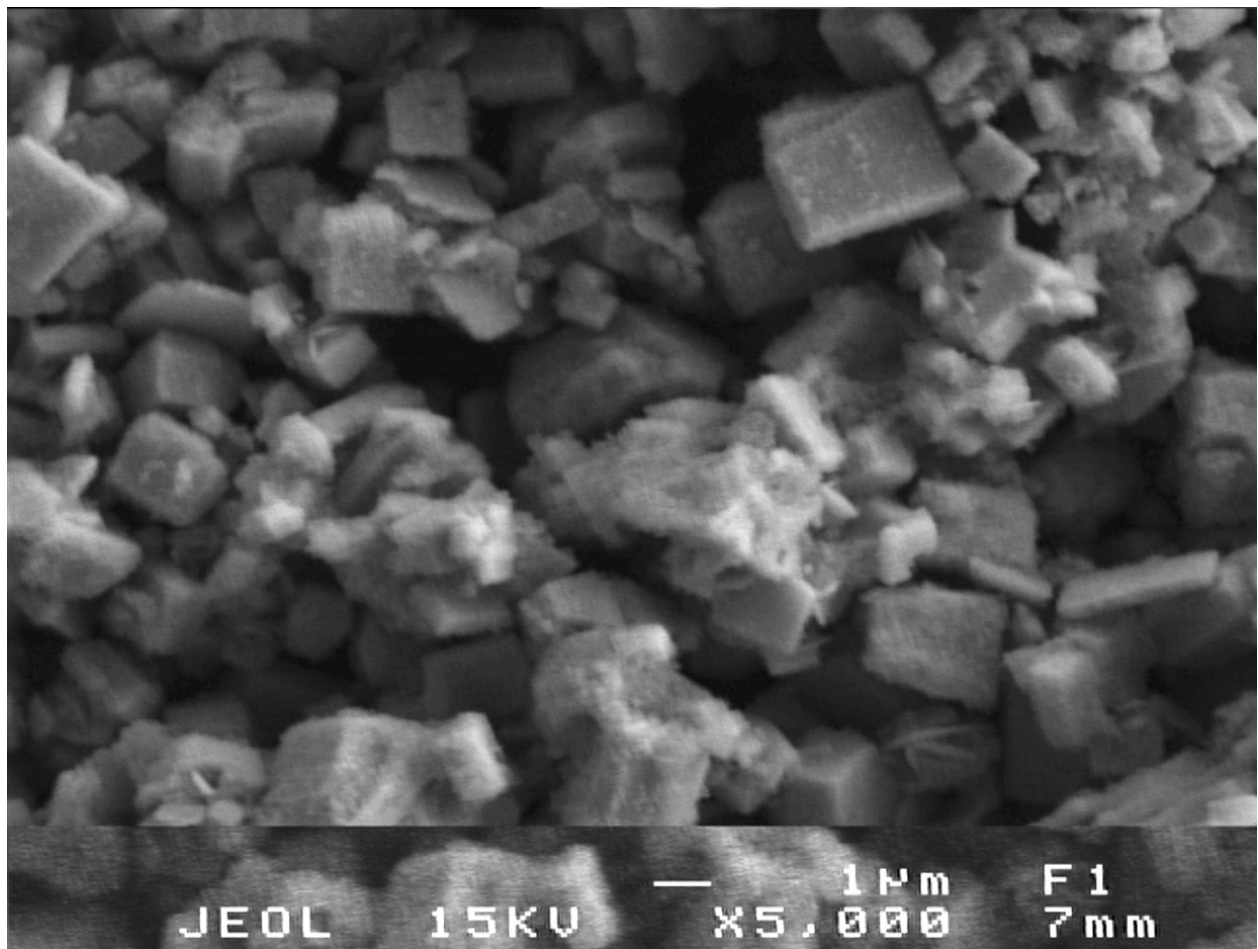

Fig. S3(B). SEM images of the 0.1Co-BVO sample.

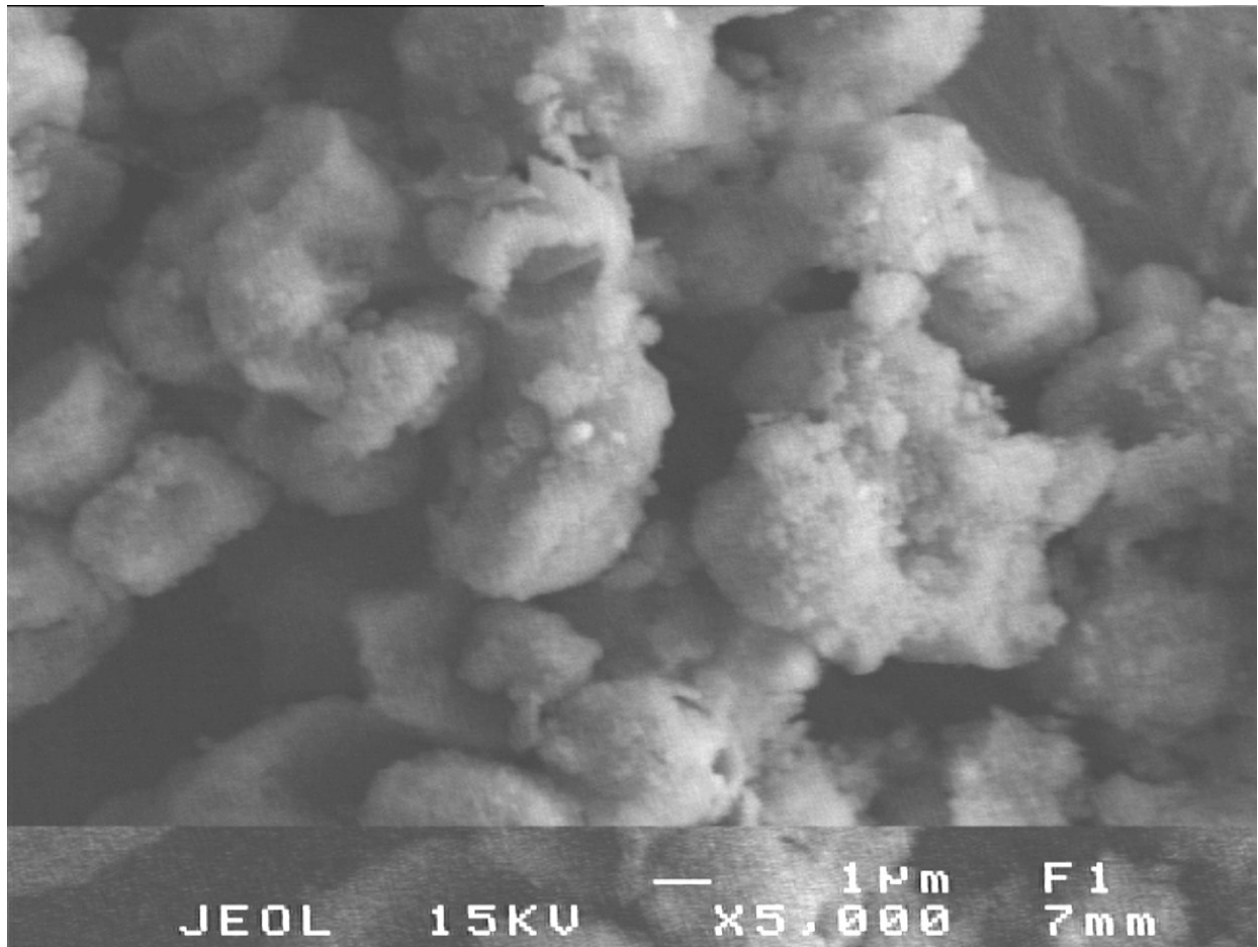

Fig. S3(C). SEM images of the 0.3Co-BVO sample.

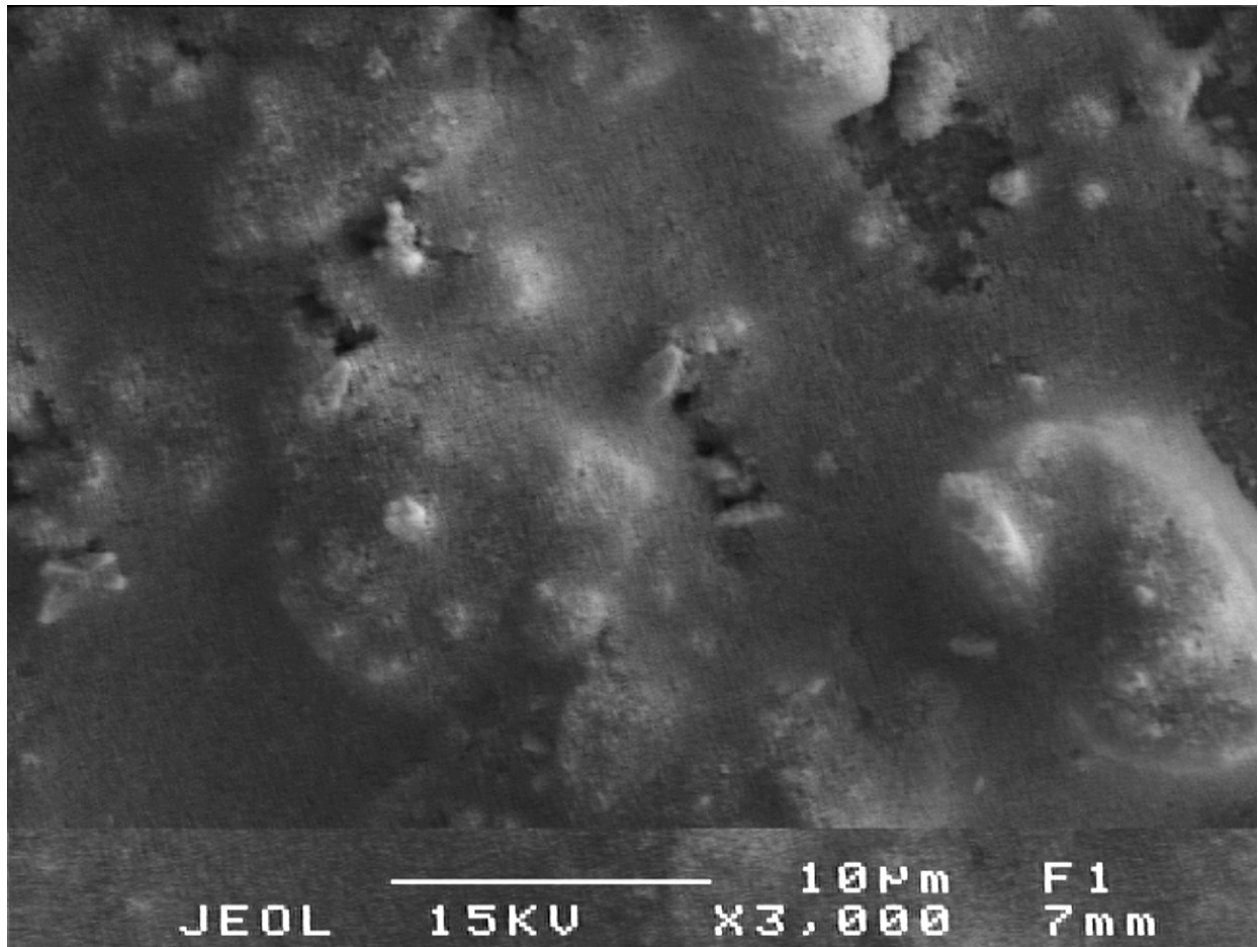

Fig. S3(D). SEM images of the 0.5Co-BVO sample.

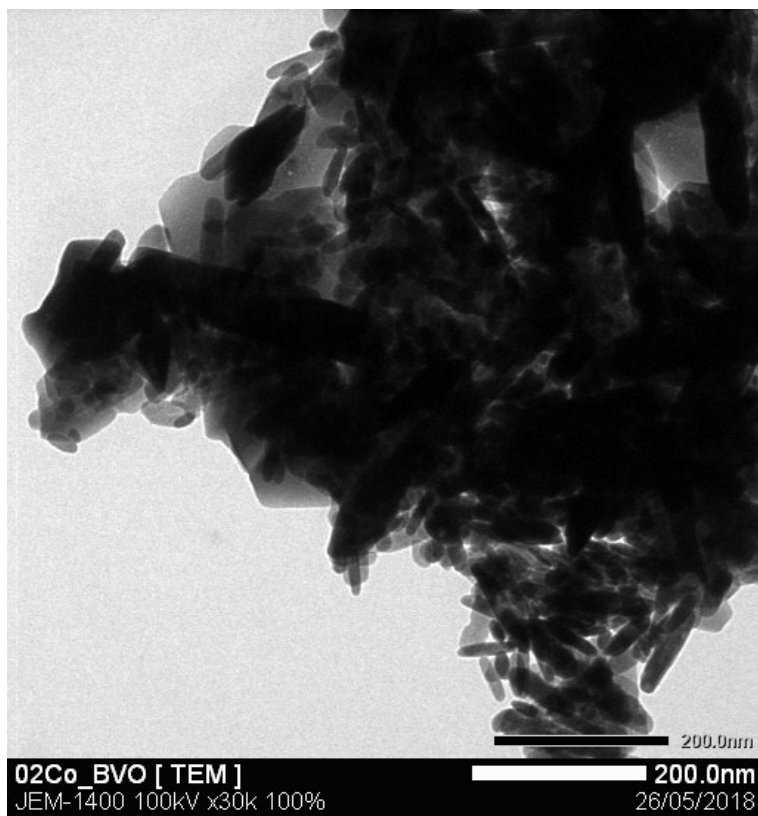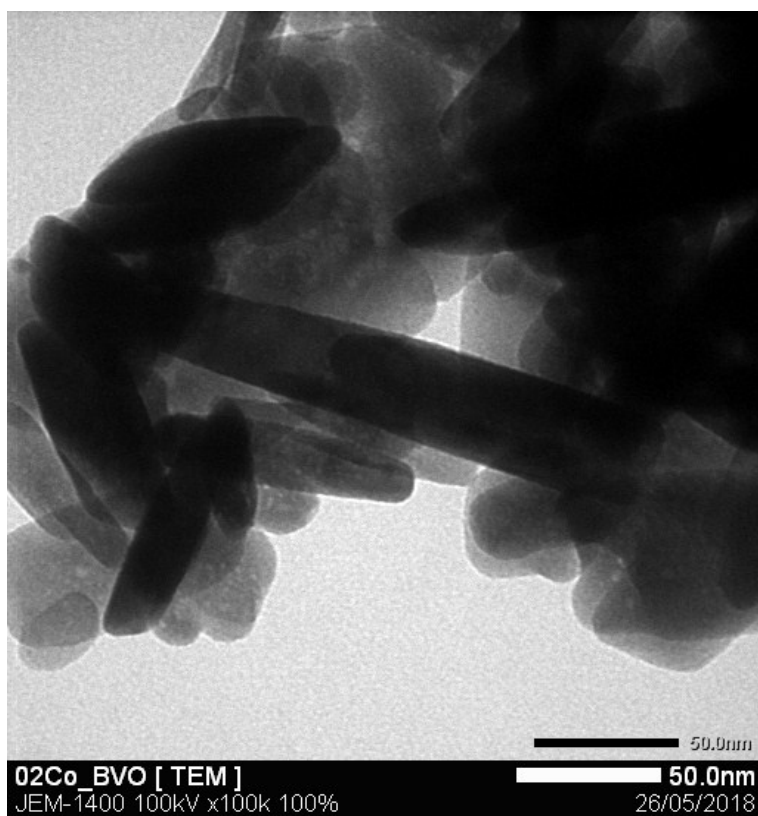

Fig. S4. TEM images of the 0.2Co-BVO sample.

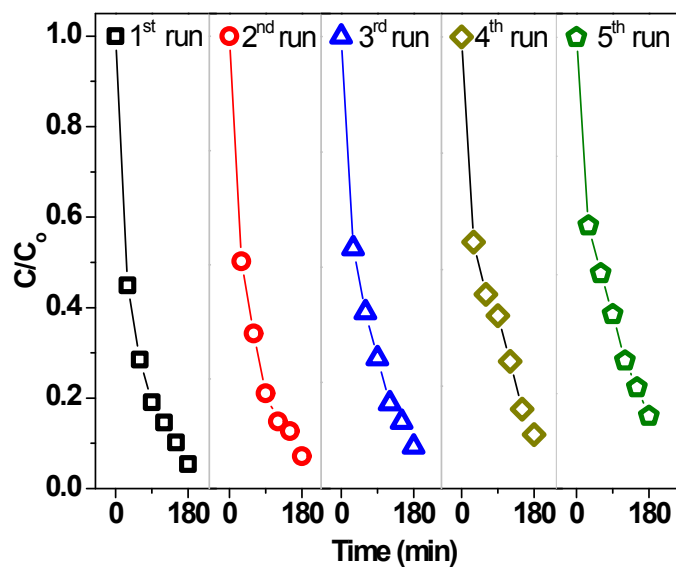

Fig. S5. Photo-stability tests over 0.2Co- BiVO<sub>4</sub> for the cycling photodegradation of MB.

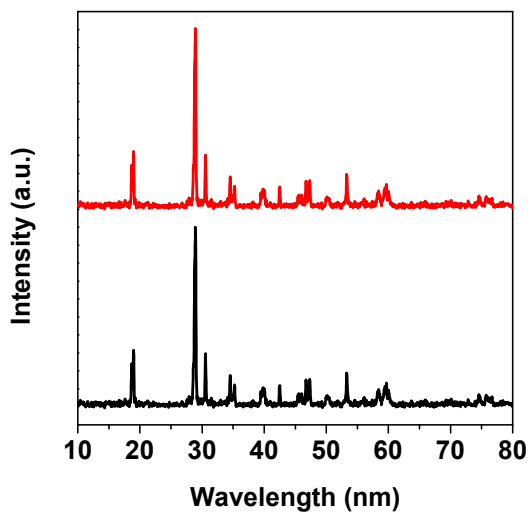

Fig. S6. XRD patterns of 0.2Co-BVO catalyst before/after five runs



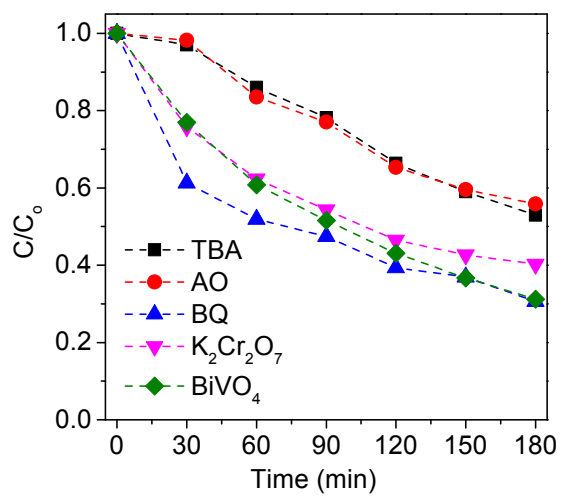

Fig. S7. Trapping experiments of photocatalytic degradation of MB over BiVO<sub>4</sub> with the presence of scavengers: TBA (a), AO (b), BQ (c) and K<sub>2</sub>Cr<sub>2</sub>O<sub>7</sub> (d), and without the presence of scavenger (e).

Table S1. A comparison of photocatalytic activity of photocatalysts.

| No. | Catalyst                                                                                                                                                                   | MB volume and concentration  | Light source                                             | t <sup>a</sup> | H <sup>b</sup> | k <sub>app</sub> <sup>c</sup>       | Reff. |
|-----|----------------------------------------------------------------------------------------------------------------------------------------------------------------------------|------------------------------|----------------------------------------------------------|----------------|----------------|-------------------------------------|-------|
| 1   | CeO <sub>2</sub> /BiVO <sub>4</sub> composite                                                                                                                              | ~50 μM                       | Simulated solar illumination (100 mW cm <sup>-2</sup> ). | 6h             | -              | ~1.2 (h <sup>-1</sup> )             | [1]   |
| 2   | TiO <sub>2</sub> /BiVO <sub>4</sub> composite                                                                                                                              | ~50 μM                       | Simulated solar illumination (100 mW cm <sup>-2</sup> ). | 6h             | -              | ~1.1 (h <sup>-1</sup> )             | [1]   |
| 3   | WO <sub>3</sub> /BiVO <sub>4</sub> composite                                                                                                                               | ~50 μM                       | Simulated solar illumination (100 mW cm <sup>-2</sup> ). | 6h             | -              | ~0.8 (h <sup>-1</sup> )             | [1]   |
| 4   | Monoclinic BiVO <sub>4</sub> powders                                                                                                                                       | 100 mL, 20 mgL <sup>-1</sup> | A300 W tungsten halogen lamp and a 420- nm cutoff filter | 3h             | 96%            | -                                   | [2]   |
| 5   | Monoclinic BiVO <sub>4</sub>                                                                                                                                               | 50 ml, 10 <sup>-5</sup> M    | Simulated visible light                                  | 240 min        | 62%            | -                                   | [3]   |
| 6   | Composite-phase BiVO <sub>4</sub> (scheelite-tetragonal and scheelite-monoclinic)                                                                                          | 250 mL, 10 mgL <sup>-1</sup> | A 500-W Xe lamp with a 420 nm cutoff filter              | 120 min        | 95%            | -                                   | [4]   |
| 7   | Cobalt-doped BiVO <sub>4</sub> (Co-BiVO <sub>4</sub> )                                                                                                                     | 100 mL, 10 mgL <sup>-1</sup> | A 150-W Xe lamp with a 420 nm cutoff filter              | 5 h            | 85%            | -                                   | [5]   |
| 8   | Yb <sup>3+</sup> , Er <sup>3+</sup> , and Tm <sup>3+</sup> doped BiVO <sub>4</sub> (with 6:3:3 mole percentage of Yb <sup>3+</sup> : Er <sup>3+</sup> : Tm <sup>3+</sup> ) | 70 mL, 20 ppm                | A 100 W infrared lamp (NIR light source)                 | 480 min        | 74.4 %         | 0.00276 min <sup>-1</sup>           | [6]   |
| 9   | Yb <sup>3+</sup> , Er <sup>3+</sup> , and Tm <sup>3+</sup> doped BiVO <sub>4</sub> (with 6:3:3 mole percentage of Yb <sup>3+</sup> : Er <sup>3+</sup> : Tm <sup>3+</sup> ) | 70 mL, 20 ppm                | UV cut off solar light simulator (visible light source)  | 180 min        | 92.98%         | 0.013 min <sup>-1</sup>             | [6]   |
| 10  | Yttrium-doped BiVO <sub>4</sub> (3% at)                                                                                                                                    | 250 mL, 10 ppm               | A Hg-Xe lamp of 200 W                                    | 120 min        | 100%           | 4. 10 <sup>-4</sup> s <sup>-1</sup> | [7]   |
| 11  | Yb <sup>3+</sup> , Er <sup>3+</sup> -codoped BiVO <sub>4</sub> with an Er <sup>3+</sup> to Yb <sup>3+</sup> ratio of 1:4.                                                  | 150 mL, 10 ppm               | An Hg–Xe lamp of 250 W                                   | 120 min        | 100%           | 12.10 <sup>-4</sup> s <sup>-1</sup> | [8]   |
| 12  | Er-doped BiVO <sub>4</sub> (3 at%)                                                                                                                                         | 50 mL, 10 mg L <sup>-1</sup> | a 150 W Xe lamp                                          | 120 min        | 100%           | 6.10 <sup>-4</sup> s <sup>-1</sup>  | [9]   |
| 13  | Tb <sup>3+</sup> doped BiVO <sub>4</sub> (2                                                                                                                                | 300 mL                       | A 500 W xenon                                            | 120            | 99.9%          |                                     | [10]  |

|                                                                                                                                             | at%)                                                                                                             | ofMB (10 mg/L                  | lamp                                                                                                 | min     |      |                                              |            |
|---------------------------------------------------------------------------------------------------------------------------------------------|------------------------------------------------------------------------------------------------------------------|--------------------------------|------------------------------------------------------------------------------------------------------|---------|------|----------------------------------------------|------------|
| 14                                                                                                                                          | PPy/Bi <sub>2</sub> WO <sub>6</sub> (PPy 0.5 wt%) composites (shown                                              | 100 mL, 10 <sup>-5</sup> mol/L | A 500 W Xe lamp with a UV cut-off filter (420 nm)                                                    | 30 min  | 100% |                                              | [11]       |
| 15                                                                                                                                          | Poly-o-phenylenediamine modified TiO <sub>2</sub> nanocomposites                                                 | 30 ml, 40 mg/L                 | A 1000 W xenon lamp                                                                                  | 180 min | -    | 0.0033 min <sup>-1</sup>                     | [12]       |
| 16                                                                                                                                          | SiO <sub>2</sub> @ $\alpha$ -Fe <sub>2</sub> O <sub>3</sub> Nanocomposites Deposited on SnS <sub>2</sub> Flowers | 100 mL, 5 ppm                  | A 410 nm LED light                                                                                   | 100 min | 96%  | -                                            | [13]       |
| 17                                                                                                                                          | Monoclinic BiVO <sub>4</sub>                                                                                     | 100 mL, 15 mg.L <sup>-1</sup>  | Six LED lamps (XLamp XT-E White, Cree X6) with the max power of 10 W and max light output of 1040 lm | 180 min | 72%  | 0.633 (10 <sup>-3</sup> .min <sup>-1</sup> ) | This study |
| 18                                                                                                                                          | 0.2Co-BVO                                                                                                        | 100 mL, 15 mg.L <sup>-1</sup>  | Six LED lamps (XLamp XT-E White, Cree X6) with the max power of 10 W and max light output of 1040 lm | 180 min | 98%  | 1.882 (10 <sup>-3</sup> .min <sup>-1</sup> ) | This study |
| <sup>a</sup> Time of irradiation<br><sup>b</sup> The degradation rate<br><sup>c</sup> Apparent first-order rate constants of MB degradation |                                                                                                                  |                                |                                                                                                      |         |      |                                              |            |

## Reference

- [1] K. Pingmuang, J. Chen, W. Kangwansupamonkon, G.G. Wallace, S. Phanichphant, A. Nattestad, Composite Photocatalysts Containing BiVO<sub>4</sub> for Degradation of Cationic Dyes, *Sci. Rep.* 7 (2017) 8929. doi:10.1038/s41598-017-09514-5.
- [2] X. Zhang, Z. Ai, F. Jia, L. Zhang, X. Fan, Z. Zou, Selective synthesis and visible-light photocatalytic activities of BiVO<sub>4</sub> with different crystalline phases, *Mater. Chem. Phys.* (2007). doi:10.1016/j.matchemphys.2007.02.008.

- [3] S. Nikam, S. Joshi, Irreversible phase transition in BiVO<sub>4</sub> nanostructures synthesized by a polyol method and enhancement in photo degradation of methylene blue, *RSC Adv.* 6 (2016) 107463–107474. doi:10.1039/C6RA14700C.
- [4] L. Zhang, J. Long, W. Pan, S. Zhou, J. Zhu, Y. Zhao, X. Wang, G. Cao, Efficient removal of methylene blue over composite-phase BiVO<sub>4</sub> fabricated by hydrothermal control synthesis, *Mater. Chem. Phys.* 136 (2012) 897–902. doi:10.1016/j.matchemphys.2012.08.016.
- [5] B. Zhou, X. Zhao, H. Liu, J. Qu, C.P. Huang, Visible-light sensitive cobalt-doped BiVO<sub>4</sub>(Co-BiVO<sub>4</sub>) photocatalytic composites for the degradation of methylene blue dye in dilute aqueous solutions, *Appl. Catal. B Environ.* 99 (2010) 214–221. doi:10.1016/j.apcatb.2010.06.022.
- [6] C. Regmi, Y.K. Kshetri, S.K. Ray, R.P. Pandey, S.W. Lee, Utilization of visible to NIR light energy by Yb<sup>3+</sup>, Er<sup>3+</sup> and Tm<sup>3+</sup> doped BiVO<sub>4</sub> for the photocatalytic degradation of methylene blue, *Appl. Surf. Sci.* 392 (2017) 61–70. doi:10.1016/j.apsusc.2016.09.024.
- [7] S. Usai, S. Obregón, A.I. Becerro, G. Colón, Monoclinic-tetragonal heterostructured BiVO<sub>4</sub> by yttrium doping with improved photocatalytic activity, *J. Phys. Chem. C.* 117 (2013) 24479–24484. doi:10.1021/jp409170y.
- [8] S. Obregón, G. Colón, Excellent photocatalytic activity of Yb<sup>3+</sup>, Er<sup>3+</sup> co-doped BiVO<sub>4</sub> photocatalyst, *Appl. Catal. B Environ.* 152–153 (2014) 328–334. doi:10.1016/j.apcatb.2014.01.054.
- [9] S. Obregón, S.W. Lee, G. Colón, Exalted photocatalytic activity of tetragonal BiVO<sub>4</sub> by Er<sup>3+</sup> doping through a luminescence cooperative mechanism, *Dalt. Trans.* 43 (2014) 311–316. doi:10.1039/C3DT51923F.
- [10] Y. Wang, F. Liu, Y. Hua, C. Wang, X. Zhao, X. Liu, H. Li, Microwave synthesis and photocatalytic activity of Tb<sup>3+</sup> doped BiVO<sub>4</sub> microcrystals, *J. Colloid Interface Sci.* 483 (2016) 307–313. doi:10.1016/j.jcis.2016.08.048.
- [11] F. Duan, Q. Zhang, D. Shi, M. Chen, Enhanced visible light photocatalytic activity of Bi<sub>2</sub>WO<sub>6</sub> via modification with polypyrrole, *Appl. Surf. Sci.* 268 (2013) 129–135. doi:10.1016/j.apsusc.2012.12.031.
- [12] C. Yang, W. Dong, G. Cui, Y. Zhao, X. Shi, X. Xia, B. Tang, W. Wang, Highly-efficient photocatalytic degradation of methylene blue by PoPD-modified TiO<sub>2</sub> nanocomposites due to photosensitization-synergetic effect of TiO<sub>2</sub> with PoPD, *Sci. Rep.* (2017). doi:10.1038/s41598-017-04398-x.
- [13] S. Balu, K. Uma, G.T. Pan, T.C.K. Yang, S.K. Ramaraj, Degradation of methylene blue dye in the presence of visible light using SiO<sub>2</sub>@ $\alpha$ -Fe<sub>2</sub>O<sub>3</sub> nanocomposites deposited on SnS<sub>2</sub> flowers, *Materials (Basel)*. (2018). doi:10.3390/ma11061030.
